# Supplementary material
Source: PubMed Central journal article supplement (PMC4228192)
Supplement: NIHMS506-supplement-1.pdf [file NIHMS506-supplement-1.pdf]

## Supplementary methods

### ***Primary decidual endothelial cell isolation***

Primary human first-trimester decidual endothelial cells were isolated using a modification of the method described by Grimwood *et al* 1995.<sup>1</sup> In brief, maternal decidual tissue from samples obtained from first trimester therapeutic abortions of apparently healthy pregnancies was washed with HBSS, cut into 3mm<sup>3</sup> pieces and incubated with 2mg/mL collagenase type 1A (Sigma) in McCoy's 5A medium with 10% (v/v) FCS, 100U/mL penicillin and 0.1mg/mL streptomycin, for 2h at 37°C. The cell suspension was filtered through a 100µm mesh, washed repeatedly with PBS/0.1% (w/v) BSA and further digested in 0.1% (w/v) trypsin (Sigma 1:250) with 0.05% (w/v) DNase I (Roche) for 5 minutes then washed with medium containing 10% (v/v) serum. Ulex europaeus 1 (UEA1, Sigma) was covalently bound to tosylactivated M-450 Dynabeads according to manufacturer's instructions (Dyna, UK). Positive selection of endothelial cells using UEA1-coated dynabeads was performed as described.<sup>1</sup> The selected cells were washed, resuspended in McCoy's medium with 50% (v/v) human serum (pooled male AB), 5ng/mL vascular endothelial growth factor, 16IU/mL heparin, 2mg/mL magnesium sulphate, 100U/mL penicillin and 0.1mg/mL streptomycin and plated in collagen-coated wells.

### ***Immunoprecipitation and western blot analysis of endothelial Fas expression***

SGHEC-7 cells (approximately 5×10<sup>6</sup> cells) or primary decidual endothelial cells (approximately 10<sup>6</sup> cells) were lysed in 1mL of RIPA buffer (1×PBS, 1% (v/v) NP40, 0.5% (w/v) sodium deoxycholate, 0.1% (w/v) SDS) with 0.1mg/mL PMSF, 30µL/mL aprotinin, and 1mmol/L sodium orthovanadate at 4°C for 30 minutes. Lysate was

incubated with 2 $\mu$ g of monoclonal anti-Fas (B-10, Santa Cruz) for 1h at 4°C. Protein-G PLUS agarose was added (20 $\mu$ L, Santa Cruz) for 16h at 4°C with rotation. The pellet was collected by centrifugation at 1000g for 5 minutes at 4°C, washed three times with RIPA buffer then resuspended in sample buffer. The samples were separated by SDS-polyacrylamide gel electrophoresis and transferred to a nitrocellulose membrane. Following incubation in blocking buffer (10mmol/L Tris, pH 8, 150mmol/L NaCl, 0.05% Tween 20, 10% (w/v) milk powder) for 1h at room temperature, the membrane was incubated with monoclonal anti-Fas (MAB142, R&D) at 1 $\mu$ g/mL in blocking buffer for 1h. After washing, the membrane was incubated with anti-mouse IgG peroxidase (A4416, Sigma) at a 1:1000 dilution in blocking buffer for 1h. Detection of membrane bound antibodies was carried out by chemiluminescence (ECLPlus, Amersham).

#### ***Western blot analysis of endothelial c-FLIP expression***

For analysis of c-FLIP expression, SGHEC-7 endothelial cells were seeded in culture plates and SGHPL-4 extravillous trophoblast cells or SGHEC-7 (to control for cell number) were seeded at the same concentration as the SGHEC-7 cells in tissue culture inserts (Nalge Nunc, 0.4 $\mu$ m membrane). After 16h the medium was changed to phenol-red free RPMI/M199 containing with 0.5% (w/v) gelding serum and the inserts were added to the plates (three 25mm inserts/ 9cm plate). After the stated time the endothelial cells on the plate were lysed in RIPA buffer and western blot analysis was carried out. The samples were separated by SDS-polyacrylamide gel electrophoresis and transferred to a nitrocellulose membrane. Following incubation in blocking buffer (10mmol/L Tris, pH 8, 150mmol/L NaCl, 0.05% Tween 20, 10% (w/v) milk powder) for 1h at room temperature, the membrane was incubated with rabbit polyclonal anti-human FLIP (FLICE/caspase 8-inhibitory protein, 1:500, BD PharMingen) which detects the long form of FLIP or monoclonal anti-human FLIP

(1:200, Santa Cruz Biotechnology) which also detects the shorter forms of FLIP for 1h. Anti-rabbit IgG peroxidase (1:6000, A6154, Sigma) or anti-mouse IgG peroxidase (1:5000, A4416, Sigma) were added for 1h. Detection of membrane bound antibodies was carried out by chemiluminescence (ECLPlus, Amersham).

### **References**

1. Grimwood J, Bicknell R, Rees MC. The isolation, characterization and culture of human decidual endothelium. *Hum Reprod.* 1995;10:2142-2148.
